# Supplementary material for: Disulfide-Modified Mesoporous Silica Nanoparticles for Biomedical Applications
Source: MDPI journal article supplement (doi:10.3390/cryst13071067), 2023-07-06
Supplement: s1 [file s1]

## Supporting Materials

# Disulfide-Modified Mesoporous Silica Nanoparticles for Biomedical Applications

Melissa Venedicto<sup>a</sup>, Jake Carrier<sup>b</sup>, Ha Na<sup>a</sup> Chen-Yu Chang<sup>a</sup>, Daniela Radu<sup>a</sup>, Cheng-Yu Lai<sup>a,b\*</sup>

<sup>a</sup>Department of Mechanical and Materials Engineering, Florida International University (FIU), Miami, FL 33174

<sup>b</sup>Department of Chemistry and Biochemistry, Florida International University (FIU), Miami, FL 33174

\*Corresponding Author

### Equation S1:

DOX drug loading efficiency was calculated from the following equation[1,2]:

$$\text{Drug Loading Efficiency (\%)} = \frac{1000MV(C_0 - C_e)}{m} * 100\%$$

where V is the volume of the supernatant,  $C_0$  and  $C_e$  are the initial and equilibration concentration of DOX in the MSN samples, M is the molar mass of DOX, and m is the mass of MSN samples.

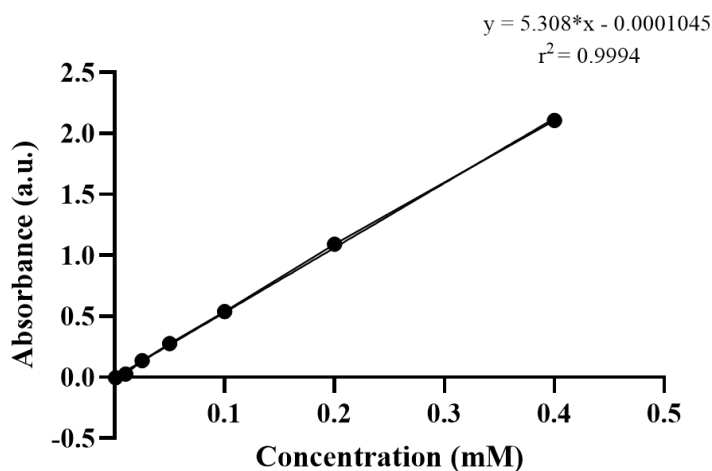

Figure S1: Doxorubicin calibration curve at 480nm wavelengths

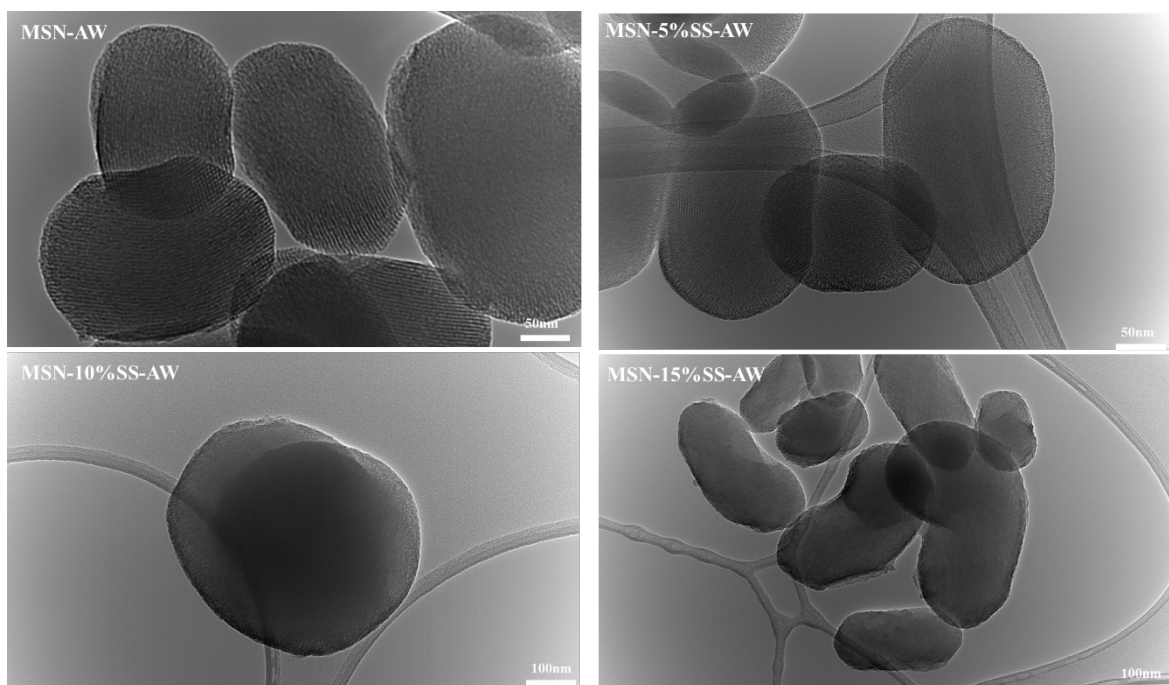

Figure S2: TEM Surface Morphology Comparison of MSN-disulfide

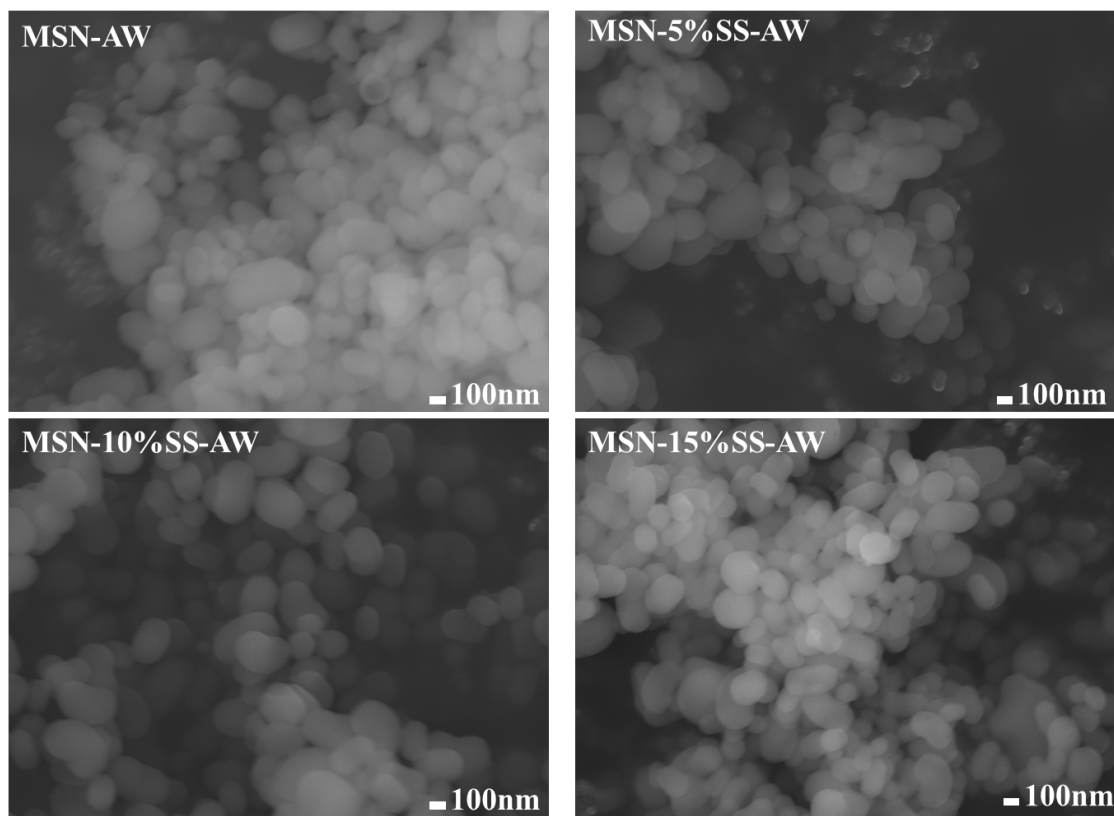

Figure S3: SEM Surface Morphology Comparison of MSN-disulfide

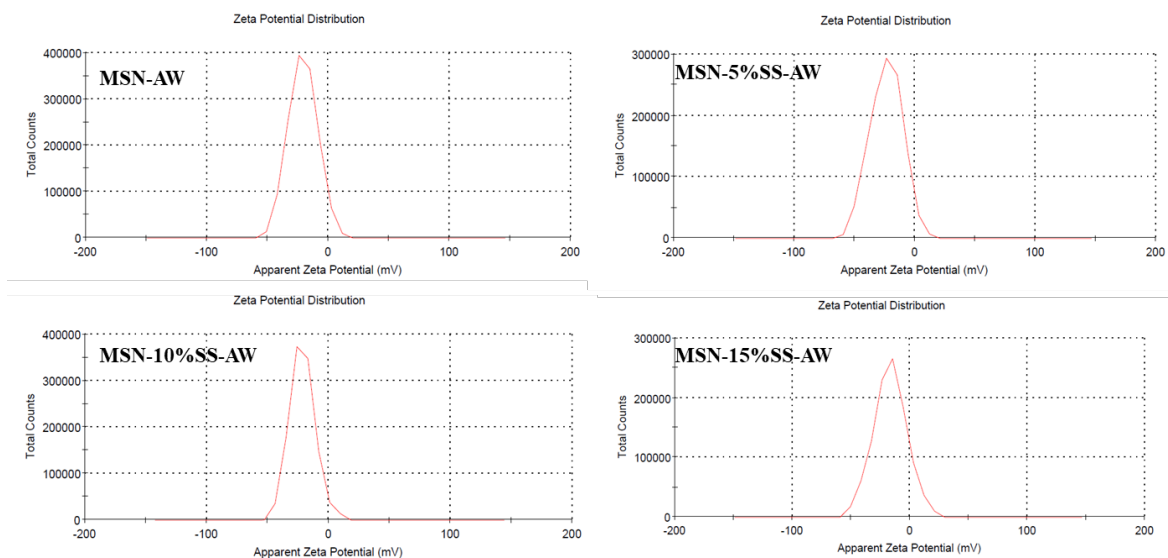

Figure S4: Zeta potential Comparison of MSN-AW to disulfide-MSN

| Material  | Zeta Potential (mV) |
|-----------|---------------------|
| MSN-AW    | $-20.8 \pm 11.8$    |
| MSN-5%SS  | $-23.6 \pm 13.4$    |
| MSN-10%SS | $-21.5 \pm 10.4$    |
| MSN-15%SS | $-16.6 \pm 14.4$    |

Table S1: MSN Zeta Potential among various disulfide concentrations.

## Equation S2:

Interplanar spacing ( $d_{100}$ ) was calculated by using Bragg's Law[3]

$$d_{100} = \frac{\lambda}{2} * \sin\theta_{100}$$

where ( $d_{100}$ ) is the interplanar distance ( $\text{\AA}$ ),  $\lambda$  is the wavelength of the Cu K $\alpha$  radiation, and  $\theta$  is the position of the peak (degrees). The pore size ( $a_0$ ) can be calculated through Bragg's Law, such as:

$$a_0 = \frac{2}{\sqrt{3}} d_{100}$$

| Material  | $d_{100}$ ( $\text{\AA}$ ) | $d_{110}$ ( $\text{\AA}$ ) | $d_{200}$ ( $\text{\AA}$ ) |
|-----------|----------------------------|----------------------------|----------------------------|
| MSN-AS    | 4.78                       | 3.21                       | 2.37                       |
| MSN-5%SS  | 4.82                       | 3.02                       | 2.33                       |
| MSN-10%SS | 4.59                       | 2.65                       | 2.31                       |
| MSN-15%SS | 4.59                       | 2.65                       | 2.28                       |

Table S2: MSN-AS nanocarrier using lattice parameter analysis via XRD

| Material      | $d_{100}$ (Å) | $d_{110}$ (Å) | $d_{200}$ (Å) |
|---------------|---------------|---------------|---------------|
| MSN-AW        | 4.84          | 2.77          | 2.37          |
| MSN-5%SS-AW   | 4.74          | 2.71          | 2.34          |
| MSN-10%SS-AW  | 4.53          | 2.63          | 2.27          |
| MSN-15%SS-AW  | 4.58          | 2.64          | 2.29          |
| MSN-10%SS-DOX | 0.96          | -             | -             |

Table S3: MSN-AW nanocarrier using lattice parameter analysis via XRD

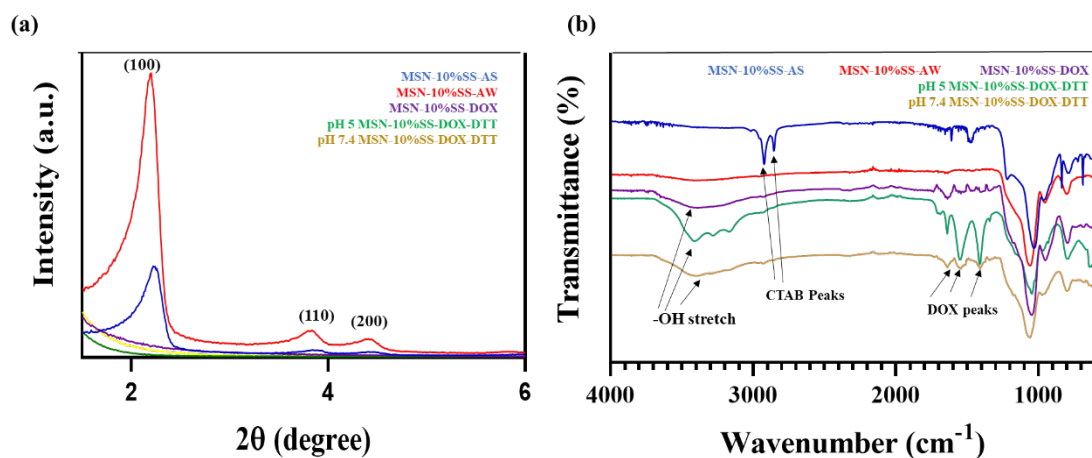

Figure S4: (a) XRD analysis between MSN-AS, MSN-AW, MSN-DOX, and MSN-DOX-DTT to show deformed structure after pore filling, and (b) FTIR analysis between MSN-AS, MSN-AW, MSN-DOX, and MSN-DOX-DTT.

## References:

1. Mao, C.; Xiang, Y.; Liu, X.; Cui, Z.; Yang, X.; Li, Z.; Zhu, S.; Zheng, Y.; Yeung, K.W.K.; Wu, S. Repeatable Photodynamic Therapy with Triggered Signaling Pathways of Fibroblast Cell Proliferation and Differentiation To Promote Bacteria-Accompanied Wound Healing. *ACS Nano* **2018**, *12*, 1747-1759, doi:10.1021/acsnano.7b08500.
2. Liu, M.; Radu, D.R.; Selopal, G.S.; Bachu, S.; Lai, C.Y. Stand-Alone CuFeSe(2) (Eskebornite) Nanosheets for Photothermal Cancer Therapy. *Nanomaterials (Basel)* **2021**, *11*, doi:10.3390/nano11082008.
3. Jaroniec, M.; Kruk, M.; Shin, H.J.; Ryoo, R.; Sakamoto, Y.; Terasaki, O. Comprehensive characterization of highly ordered MCM-41 silicas using nitrogen adsorption, thermogravimetry, X-ray diffraction and transmission electron microscopy. *Microporous and Mesoporous Materials* **2001**, *48*, 127-134, doi:[https://doi.org/10.1016/S1387-1811\(01\)00335-3](https://doi.org/10.1016/S1387-1811(01)00335-3).
